# Supplementary material for: Assessing the risk of falling in community-dwelling older adults through cognitive domains and machine learning techniques
Source: PeerJ journal article supplement (doi:10.7717/peerj-cs.3367), 2025-11-17
Supplement: code.zip [file Planilla_pruebas.xlsx]

## Sheet: Hoja1
	Study data base
Nº	educational level	age	TMT B	DSB	SCWI	MiniBESTest
1	1	63	588	5	496	19	*
2	6	79	230	9	193	25
3	1	72	340	7	278	22
4	12	75	121	12	103	25
5	12	64	220	8	126	22
6	12	70	197	8	156	27
7	10	72	345	7	149	24
8	12	69	180	10	66.5	22
9	12	80	246	10	97	22
10	9	82	154	8	78	23
11	8	83	250	11	99.5	24
12	8	67	254	11	197.5	24
13	5	73	273	7	135	21
14	12	63	64	11	42.5	28
15	6	78	139	11	73	24
16	10	81	173	14	100.5	25
17	3	75	302	9	147	20
18	4	84	126	14	81.5	21
19	8	74	227	8	65.5	23
20	6	79	393	9	175	15
21	1	69	559	7	449.5	20	*
22	12	69	153	11	104.5	18
23	12	61	168	12	132	24
24	4	77	138	15	124	24
25	9	82	205	11	97	26
26	12	63	87	10	70.5	26
27	6	70	124	11	132	24
28	8	83	321	11	149	23
29	6	70	638	8	215	16	*
30	8	74	248	8	64.5	24
31	2	76	184	15	148	23
32	3	72	203	7	140	21
33	6	77	258	8	131	24
34	8	62	100	10	71	25
35	5	64	372	8	74.5	22
36	7	62	102	10	78.5	26
37	8	68	289	7	129.5	20
38	14	76	77	11	107	26
39	8	79	276	9	112	25
40	16	86	146	10	115	24
41	13	75	249	12	131.5	26
42	12	66	200	10	75	27
43	8	82	169	10	121.5	25
44	10	64	146	11	81	27
45	12	70	124	11	72.5	23
46	12	67	164	7	101	25
47	6	65	134	10	90.5	27
48	5	69	335	7	254.5	24
49	12	63	176	11	57	26
50	12	63	162	8	114.5	25
